# Supplementary material for: Deciphering the Electrostatic and Structural dynamics due to point Mutation in DNA gyrase leading to acquired Quinolone resistance in Mycobacterium tuberculosis
Source: Research Square preprint supplement (doi:10.21203/rs.3.rs-5778481/v1), 2025-01-09
Supplement: Supplementary file 1 [file fccab8ade291a34a68a3932a.docx]

Supplementary Data

**Deciphering the Electrostatic and Structural dynamics due to point Mutation in DNA gyrase leading to acquired Quinolone resistance in *Mycobacterium* tuberculosis**.

Sumit Kumar Rai1, Dev Bukhsh Singh2*, Satendra Singh1

1Jacob Institute of Biotechnology and Bioengineering, Sam Higginbottom University of Agriculture Technology and Sciences, Prayagraj-211007, U. P., India.

2Department of Biotechnology, Siddharth University, Kapilvastu, Siddharth Nagar-272202, U.P., India.

***Corresponding author**

Email: answer.dev@gmail.com


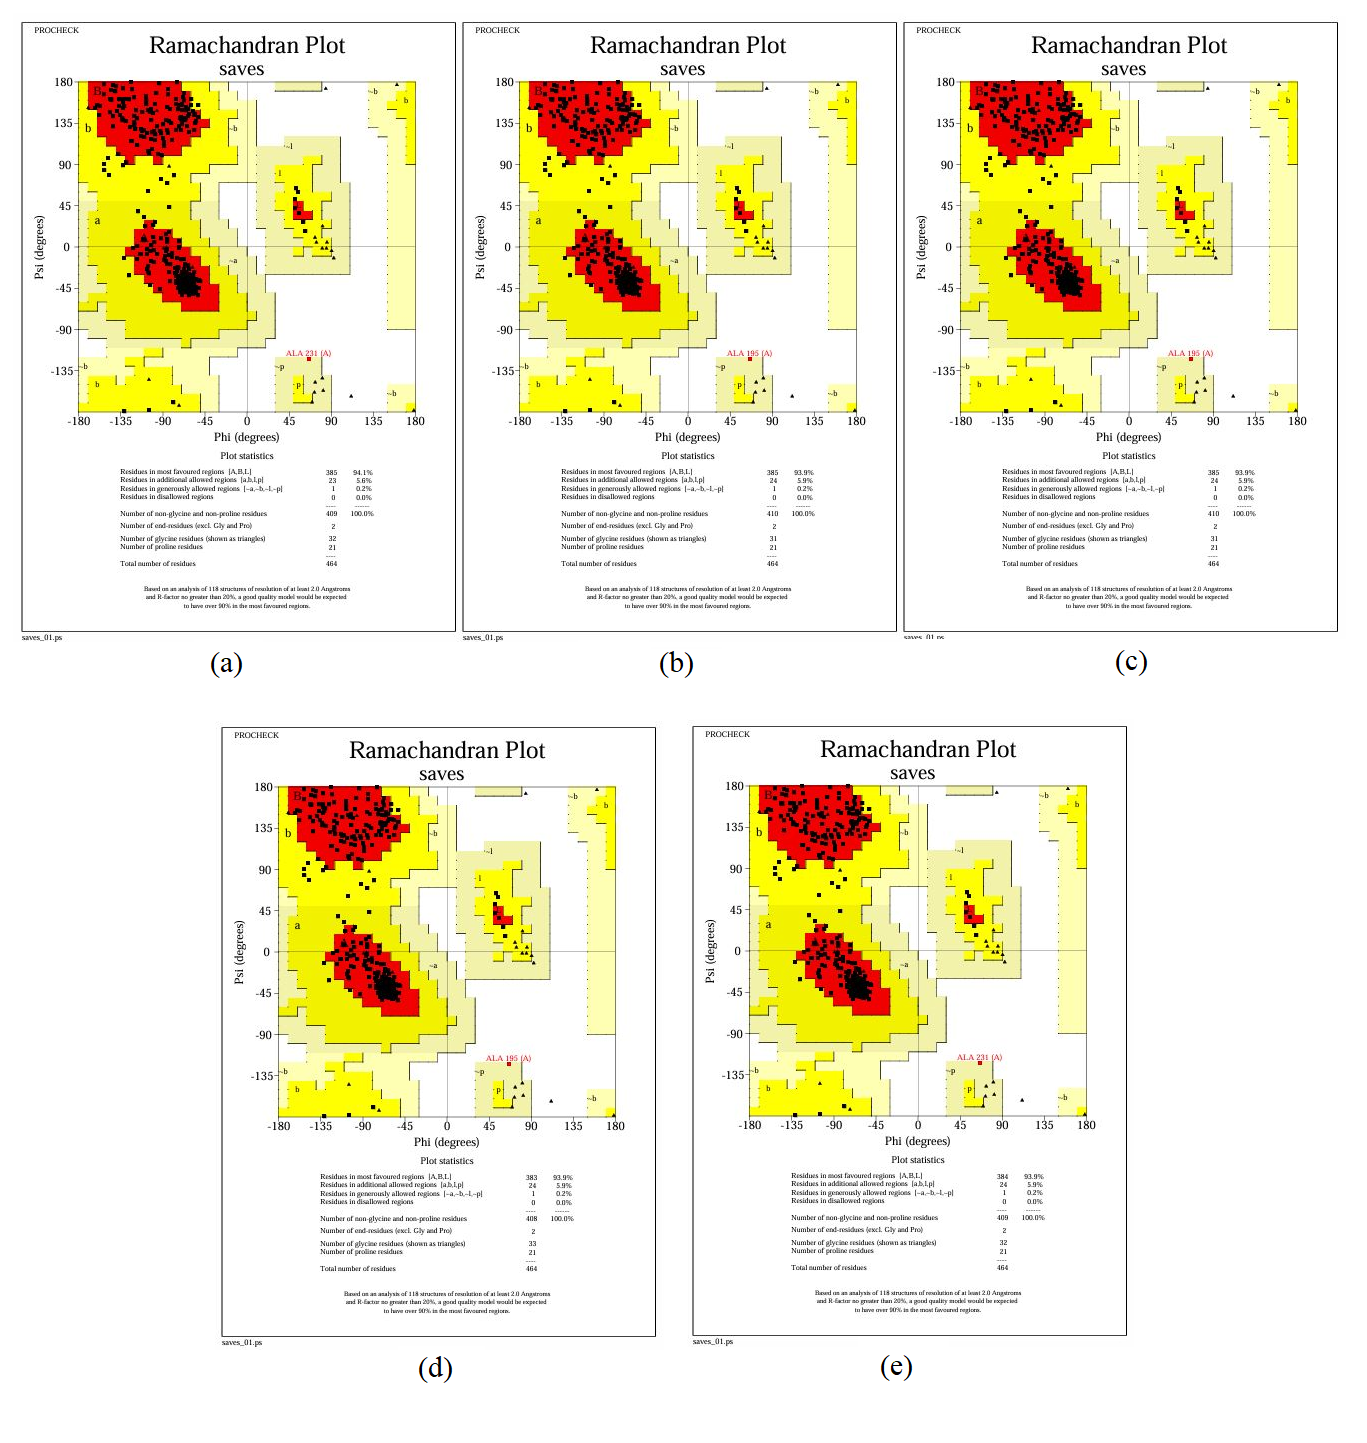


Supplementary Figure 1: Ramachandran plot depicting the stability of protein DNA gyrase A (a) 3ILW_wild (b) 3ILW_G88A (c)3ILW_G88C (d)3ILW_D94G (e) 3ILW_D94H
